# Supplementary material for: Tfs1, transcription elongation factor TFIIS, has an impact on chromosome segregation affected by pka1 deletion in Schizosaccharomyces pombe
Source: Research Square preprint supplement (doi:10.21203/rs.3.rs-2730221/v1), 2023-03-27
Supplement: Supplementary file 1 [file 305cccc05f085dc50be4610c.xlsx]

## Sheet: Table S3
	Table S3 S. pombe strains used in screening for the suppression of pka1∆
	Strain	Genotype
	TPK1	h? leu1-32 ura4-D18 SPAC1039.05c::kanMX4 pka1::ura4
	TPK2	h? leu1-32 ura4-D18 SPAC1142.08::kanMX4 pka1::ura4
	TPK3	h? leu1-32 ura4-D18 SPAC11D3.07c::kanMX4 pka1::ura4
	TPK4	h? leu1-32 ura4-D18 SPAC11D3.17::kanMX4 pka1::ura4
	TPK5	h? leu1-32 ura4-D18 SPAC1327.01c::kanMX4 pka1::ura4
	TPK6	h? leu1-32 ura4-D18 SPAC1399.05c::kanMX4 pka1::ura4
	TPK7	h? leu1-32 ura4-D18 SPAC1420.01c::kanMX4 pka1::ura4
	TPK8	h? leu1-32 ura4-D18 SPAC1486.10::kanMX4 pka1::ura4
	TPK9	h? leu1-32 ura4-D18 SPAC16.05c::kanMX4 pka1::ura4
	TPK10	h? leu1-32 ura4-D18 SPAC16A10.02::kanMX4 pka1::ura4
	TPK11	h? leu1-32 ura4-D18 SPAC1783.07c::kanMX4 pka1::ura4
	TPK12	h? leu1-32 ura4-D18 SPAC1A6.01c::kanMX4 pka1::ura4
	TPK13	h? leu1-32 ura4-D18 SPAC1B3.02c::kanMX4 pka1::ura4
	TPK14	h? leu1-32 ura4-D18 SPAC21E11.03c::kanMX4 pka1::ura4
	TPK15	h? leu1-32 ura4-D18 SPAC22F3.02::kanMX4 pka1::ura4
	TPK16	h? leu1-32 ura4-D18 SPAC23C11.08::kanMX4 pka1::ura4
	TPK17	h? leu1-32 ura4-D18 SPAC23E2.01::kanMX4 pka1::ura4
	TPK18	h? leu1-32 ura4-D18 SPAC25B8.11::kanMX4 pka1::ura4
	TPK19	h? leu1-32 ura4-D18 SPAC25B8.19c::kanMX4 pka1::ura4
	TPK20	h? leu1-32 ura4-D18 SPAC2H10.01::kanMX4 pka1::ura4
	TPK21	h? leu1-32 ura4-D18 SPAC31A2.11c::kanMX4 pka1::ura4
	TPK22	h? leu1-32 ura4-D18 SPAC3C7.04::kanMX4 pka1::ura4
	TPK23	h? leu1-32 ura4-D18 SPAC3H1.11::kanMX4 pka1::ura4
	TPK24	h? leu1-32 ura4-D188 SPAC4G8.13c::kanMX4 pka1::ura4
	TPK25	h? leu1-32 ura4-D18 SPAC56F8.16::kanMX4 pka1::ura4
	TPK26	h? leu1-32 ura4-D18 SPAC821.07c::kanMX4 pka1::ura4
	TPK27	h? leu1-32 ura4-D18 SPAC8C9.14::kanMX4 pka1::ura4
	TPK28	h? leu1-32 ura4-D18 SPAPB1A11.04c::kanMX4 pka1::ura4
	TPK29	h? leu1-32 ura4-D18 SPAPB24D3.01::kanMX4 pka1::ura4
	TPK30	h? leu1-32 ura4-D18 SPBC1289.10c::kanMX4 pka1::ura4
	TPK31	h? leu1-32 ura4-D18 SPBC1683.13c::kanMX4 pka1::ura4
	TPK32	h? leu1-32 ura4-D18 SPBC16G5.16::kanMX4 pka1::ura4
	TPK33	h? leu1-32 ura4-D18 SPBC1773.12::kanMX4 pka1::ura4
	TPK34	h? leu1-32 ura4-D18 SPBC17G9.05::kanMX4 pka1::ura4
	TPK35	h? leu1-32 ura4-D18 SPBC21B10.13c::kanMX4 pka1::ura4
	TPK36	h? leu1-32 ura4-D18 SPBC27B12.11c::kanMX4 pka1::ura4
	TPK37	h? leu1-32 ura4-D18 SPBC29B5.01::kanMX4 pka1::ura4
	TPK38	h? leu1-32 ura4-D18 SPBC2F12.09c::kanMX4 pka1::ura4
	TPK39	h? leu1-32 ura4-D18 SPBC317.01::kanMX4 pka1::ura4
	TPK40	h? leu1-32 ura4-D18 SPBC354.05c::kanMX4 pka1::ura4
	TPK41	h? leu1-32 ura4-D18 SPBC530.05::kanMX4 pka1::ura4
	TPK42	h? leu1-32 ura4-D18 SPBC530.08::kanMX4 pka1::ura4
	TPK43	h? leu1-32 ura4-D18 SPBC530.11c::kanMX4 pka1::ura4
	TPK44	h? leu1-32 ura4-D18 SPBC725.11c::kanMX4 pka1::ura4
	TPK45	h? leu1-32 ura4-D18 SPBP23A10.14c::kanMX4 pka1::ura4
	TPK46	h? leu1-32 ura4-D18 SPBP35G2.11c::kanMX4 pka1::ura4
	TPK47	h? leu1-32 ura4-D18 SPBP4H10.09::kanMX4 pka1::ura4
	TPK48	h? leu1-32 ura4-D18 SPBP8B7.23::kanMX4 pka1::ura4
	TPK49	h? leu1-32 ura4-D18 SPBP8B7.30c::kanMX4 pka1::ura4
	TPK50	h? leu1-32 ura4-D18 SPBPB8B6.04c::kanMX4 pka1::ura4
	TPK51	h? leu1-32 ura4-D18 SPCC1223.10c::kanMX4 pka1::ura4
	TPK52	h? leu1-32 ura4-D188 SPCC1223.13::kanMX4 pka1::ura4
	TPK53	h? leu1-32 ura4-D18 SPCC1393.08::kanMX4 pka1::ura4
	TPK54	h? leu1-32 ura4-D18 SPCC1494.10::kanMX4 pka1::ura4
	TPK55	h? leu1-32 ura4-D18 SPCC1902.01::kanMX4 pka1::ura4
	TPK56	h? leu1-32 ura4-D18 SPCC285.17::kanMX4 pka1::ura4
	TPK57	h? leu1-32 ura4-D18 SPCC417.09c::kanMX4 pka1::ura4
	TPK58	h? leu1-32 ura4-D18 SPCC584.01c::kanMX4 pka1::ura4
	TPK59	h? leu1-32 ura4-D18 SPCC645.13::kanMX4 pka1::ura4
	TPK60	h? leu1-32 ura4-D18 SPCC757.04::kanMX4 pka1::ura4
	TPK61	h? leu1-32 ura4-D18 SPCC777.02::kanMX4 pka1::ura4
	TPK62	h? leu1-32 ura4-D18 SPAC105.03c::kanMX4 pka1::ura4
	TPK63	h? leu1-32 ura4-D18 SPAC32A11.03c::kanMX4 pka1::ura4
	TPK64	h? leu1-32 ura4-D18 SPAC139.03::kanMX4 pka1::ura4
	TPK65	h? leu1-32 ura4-D18 SPAC1F7.11c::kanMX4 pka1::ura4
	TPK66	h? leu1-32 ura4-D18 SPAC22F3.09c::kanMX4 pka1::ura4
	TPK67	h? leu1-32 ura4-D18 SPAC3F10.12c::kanMX4 pka1::ura4
	TPK68	h? leu1-32 ura4-D18 SPBC1105.14::kanMX4 pka1::ura4
	TPK69	h? leu1-32 ura4-D18 SPBC16G5.15c::kanMX4 pka1::ura4
	TPK70	h? leu1-32 ura4-D18 SPBC16G5.17::kanMX4 pka1::ura4
	TPK71	h? leu1-32 ura4-D18 SPBC19C7.10::kanMX4 pka1::ura4
	TPK72	h? leu1-32 ura4-D18 SPBC2D10.06::kanMX4 pka1::ura4
	TPK73	h? leu1-32 ura4-D18 SPBC32H8.11::kanMX4 pka1::ura4
	TPK74	h? leu1-32 ura4-D18 SPBC3B8.02::kanMX4 pka1::ura4
	TPK75	h? leu1-32 ura4-D18 SPBC4C3.12::kanMX4 pka1::ura4
	TPK76	h? leu1-32 ura4-D18 SPCC18.03::kanMX4 pka1::ura4
	TPK77	h? leu1-32 ura4-D18 SPCC965.10::kanMX4 pka1::ura4
	TPK78	h? leu1-32 ura4-D18 SPAC22H10.11c::kanMX4 pka1::ura4
	TPK79	h? leu1-32 ura4-D18 SPAC25G10.03::kanMX4 pka1::ura4
	TPK80	h? leu1-32 ura4-D18 SPAC3H1.03::kanMX4 pka1::ura4
	TPK81	h? leu1-32 ura4-D18 SPAC6G10.12c::kanMX4 pka1::ura4
	TPK82	h? leu1-32 ura4-D18 SPBC800.02::kanMX4 pka1::ura4
	TPK83	h? leu1-32 ura4-D18 SPCC1259.07::kanMX4 pka1::ura4
	TPK84	h? leu1-32 ura4-D18 SPCC1682.07::kanMX4 pka1::ura4
	TPK85	h? leu1-32 ura4-D18 SPAC22H12.02::kanMX4 pka1::ura4
	TPK86	h? leu1-32 ura4-D18 SPBC1198.11c::kanMX4 pka1::ura4
	TPK87	h? leu1-32 ura4-D18 SPBC29A3.14c::kanMX4 pka1::ura4
	TPK88	h? leu1-32 ura4-D18 SPBC30B4.03c::kanMX4 pka1::ura4
	TPK89	h? leu1-32 ura4-D18 SPBC83.17::kanMX4 pka1::ura4
	TPK90	h? leu1-32 ura4-D18 SPCC18.15::kanMX4 pka1::ura4
	TPK91	h? leu1-32 ura4-D18 SPAC3H8.08c::kanMX4 pka1::ura4
	TPK92	h? leu1-32 ura4-D18 SPBC1773.16c::kanMX4 pka1::ura4
	TPK93	h? leu1-32 ura4-D18 SPBC19C2.09::kanMX4 pka1::ura4
	TPK94	h? leu1-32 ura4-D18 SPBC19G7.06::kanMX4 pka1::ura4
	TPK95	h? leu1-32 ura4-D18 SPBC337.03::kanMX4 pka1::ura4
	TPK96	h? leu1-32 ura4-D18 SPCC126.12::kanMX4 pka1::ura4
	TPK97	h? leu1-32 ura4-D188 SPCC320.03::kanMX4 pka1::ura4
	TPK98	h? leu1-32 ura4-D18 SPBC56F2.05c::kanMX4 pka1::ura4
	TPK99	h? leu1-32 ura4-D18 SPAC20H4.03c::kanMX4 pka1::ura4
	TPK100	h? leu1-32 ura4-D18 SPAC4H3.13::kanMX4 pka1::ura4
	TPK101	h? leu1-32 ura4-D188 SPBC23E6.09::kanMX4 pka1::ura4
	TPK102	h? leu1-32 ura4-D18 SPBC2F12.11c::kanMX4 pka1::ura4
