# Supplementary material for: Tfs1, transcription elongation factor TFIIS, has an impact on chromosome segregation affected by pka1 deletion in Schizosaccharomyces pombe
Source: Research Square preprint supplement (doi:10.21203/rs.3.rs-2730221/v1), 2023-03-27
Supplement: Supplementary file 2 [file 67718f7a117b04680ce97dc8.xlsx]

## Sheet: Table S2
	Table S2 S. pombe strains used in screening
	Systematic ID	Gene name	Bioneer knockout		TBZ sensitivity (18 µg/mL TBZ)
				Product	single knockout	double with pka1∆
	SPAC1039.05c	klf1	V4-P01-18	DNA-binding transcription factor, zf-fungal binuclear cluster type Klf	Grow	Sensitive
	SPAC1142.08	fhl1	V4-P01-51	DNA-binding forkhead transcription factor Fhl1	Grow	Sensitive
	SPAC11D3.07c	toe4	V4-P01-58	DNA-binding transcription factor, zf-fungal binuclear cluster type	Grow	Sensitive
	SPAC11D3.17		V4-P01-65	DNA-binding transcription factor, zf-fungal binuclear cluster type	Grow	Sensitive
	SPAC1327.01c		V4-P02-14	DNA-binding transcription factor, zf-fungal binuclear cluster type	Grow	Sensitive
	SPAC1399.05c	toe1	V4-P02-21	DNA-binding transcription factor, zf-fungal binuclear cluster type	Grow	Sensitive
	SPAC1420.01c		V4-P02-61	GATA-like domain protein	Grow	Suppressed
	SPAC1486.10	thi1	V4-P02-75	DNA-binding transcription factor Thi1	Grow	Sensitive
	SPAC16.05c	sfp1	V4-P03-26	DNA-binding transcription factor Sfp1	Grow	Sensitive
	SPAC16A10.02	sub1	V4-P03-49	transcription coactivator PC4	Grow	Sensitive
	SPAC1783.07c	pap1	V4-P03-77	DNA-binding transcription factor, oxidative stress-responsive Pap1/Caf3	Grow	Suppressed
	SPAC1A6.01c		V4-P05-32	human thyroid receptor interacting protein homolog, transcription coactivator	Grow	Sensitive
	SPAC1B3.02c		V4-P05-42	transcription elongation factor, Elf1 family	Grow	Sensitive
	SPAC21E11.03c	pcr1	V4-P06-14	DNA-binding transcription factor Pcr1	Grow	Sensitive
	SPAC22F3.02	atf31	V4-P06-47	DNA-binding transcription factor Atf31	Grow	Sensitive
	SPAC23C11.08	php3	V4-P06-90	CCAAT-binding factor complex subunit Php3	Grow	Sensitive
	SPAC23E2.01	fep1	V4-P07-13	DNA-binding transcription factor, iron-sensing Fep1	Grow	Suppressed
	SPAC25B8.11		V4-P07-58	DNA-binding transcription factor	Grow	Sensitive
	SPAC25B8.19c	loz1	V4-P07-63	DNA-binding transcription factor zf-C2H2 type	Grow	Sensitive
	SPAC2H10.01		V4-P08-72	DNA-binding transcription factor, zf-fungal binuclear cluster type	Grow	Suppressed
	SPAC31A2.11c	cuf1	V4-P08-92	DNA-binding transcription factor, nutritional copper sensing Cuf1	Grow	Suppressed
	SPAC32A11.03c	phx1	V4-P09-25	DNA-binding transcription factor, stationary phase-specific Phx1	Grow	Sensitive
	SPAC3C7.04		V4-P09-52	DNA-binding transcription factor	Grow	Sensitive
	SPAC3H1.11	hsr1	V4-P09-90	DNA-binding transcription factor Hsr1	Grow	Sensitive
	SPAC3H8.08c		V4-P10-07	DNA-binding transcription factor	Grow	Sensitive
	SPAC4G8.13c	prz1	V4-P10-48	DNA-binding transcription factor, calcineurin responsive Prz1	Grow	Sensitive
	SPAC56F8.16	esc1	V4-P10-80	DNA-binding transcription factor Esc1	Grow	Sensitive
	SPAC821.07c	moc3	V4-P12-38	DNA-binding transcription factor Moc3	Grow	Suppressed
	SPAC8C9.14	prr1	V4-P12-76	stress-responsive DNA-binding transcription factor Prr1	Grow	Sensitive
	SPAPB1A11.04c	mca1	V4-P13-91	DNA-binding transcription factor, zf-fungal binuclear cluster type Mca1	Grow	Suppressed
	SPAPB24D3.01	toe3	V4-P14-04	DNA-binding transcription factor	Grow	Sensitive
	SPBC1289.10c	adn2	V4-P15-06	DNA-binding transcription factor Adn2	Grow	Sensitive
	SPBC15D4.02	gsf1	V4-P15-77	DNA-binding transcription factor, zf-fungal binuclear cluster type Gsf1	Sensitive	Not tested
	SPBC1683.13c	cha4	V4-P16-14	DNA-binding transcription factor Cha4	Grow	Sensitive
	SPBC16G5.16		V4-P16-62	DNA-binding transcription factor, zf-fungal binuclear cluster type	Grow	Sensitive
	SPBC1773.12		V4-P17-26	DNA-binding transcription factor, zf-fungal binuclear cluster type	Grow	Sensitive
	SPBC1773.16c		V4-P17-29	DNA-binding transcription factor, zf-fungal binuclear cluster type	Grow	Sensitive
	SPBC17G9.05	rct1	V4-P17-52	cyclophilin family peptidyl-prolyl cis-trans isomerase, RRM-containing Rct1	Grow	Suppressed
	SPBC19C2.09	sre1	V4-P17-92	DNA-binding transcription factor, sterol regulatory element binding protein Sre1	Grow	Sensitive
	SPBC19G7.06	mbx1	V4-P18-16	DNA-binding transcription factor, MADS-box Mbx1	Grow	Sensitive
	SPBC19G7.16	iws1	V4-P18-20	transcription elongation factor complex subunit Iws1	Sensitive	Not tested
	SPBC21B10.13c	yox1	V4-P18-64	MBF complex corepressor Yox1	Grow	Sensitive
	SPBC27B12.11c	pho7	V4-P19-48	DNA-binding transcription factor Pho7	Grow	Sensitive
	SPBC29B5.01	atf1	V4-P19-75	DNA-binding transcription factor, Atf-CREB family Atf1	Grow	Sensitive
	SPBC2F12.09c	atf21	V4-P20-04	DNA-binding transcription factor, Atf-CREB family Atf21	Grow	Suppressed
	SPBC317.01	mbx2	V4-P20-37	DNA-binding transcription factor, MADS-box Pvg4	Grow	Sensitive
	SPBC337.03	rhn1	V4-P20-71	RNA polymerase II transcription termination factor homolog	Grow	Sensitive
	SPBC354.05c	sre2	V4-P20-85	DNA-binding transcription factor, membrane-tethered Sre2	Grow	Sensitive
	SPBC530.05	prt1	V4-P22-03	DNA-binding transcription factor	Grow	Sensitive
	SPBC530.08		V4-P22-05	DNA-binding transcription factor, membrane-tethered	Grow	Sensitive
	SPBC530.11c		V4-P22-08	DNA-binding transcription factor, zf-fungal binuclear cluster type	Grow	Sensitive
	SPBC725.11c	php2	V4-P22-90	CCAAT-binding factor complex subunit Php2	Grow	Sensitive
	SPBP23A10.14c	ell1	V4-P23-90	RNA polymerase II transcription elongation factor Ell1	Grow	Sensitive
	SPBP35G2.11c	nbr1	V4-P24-04	cargo receptor for selective autophagy pathway	Grow	Sensitive
	SPBP4H10.09	rsv1	V4-P24-14	DNA-binding transcription repressor Rsv1	Grow	Sensitive
	SPBP8B7.23	rnf10	V4-P24-38	ubiquitin-protein ligase E3	Grow	Sensitive
	SPBP8B7.30c	thi5	V4-P24-44	DNA-binding transcription factor Thi5	Grow	Sensitive
	SPBPB8B6.04c	grt1	V4-P24-65	DNA-binding transcription factor Grt1	Grow	Sensitive
	SPCC1223.10c	eaf1	V4-P24-94	RNA polymerase II transcription elongation factor Eaf1	Grow	Sensitive
	SPCC1223.13	cbf12	V4-P24-96	DNA-binding transcription factor, CBF1/Su(H)/LAG-1 family Cbf12	Grow	Sensitive
	SPCC126.12		V4-P25-29	DUF34 family protein	Grow	Sensitive
	SPCC1393.08	fil1	V4-P25-46	DNA-binding transcription factor, zf-GATA type	Grow	Sensitive
	SPCC1494.10	adn3	V4-P25-72	DNA-binding transcription factor Adn3	Grow	Sensitive
	SPCC1902.01	gaf1	V4-P26-61	DNA-binding transcription factor Gaf1	Grow	Sensitive
	SPCC285.17	spp27	V4-P27-03	RNA polymerase I upstream activation factor complex subunit Spp27	Grow	Sensitive
	SPCC320.03		V4-P27-20	DNA-binding transcription factor	Grow	Sensitive
	SPCC417.09c		V4-P27-43	DNA-binding transcription factor	Grow	Sensitive
	SPCC584.01c	met10	V4-P27-82	sulfite reductase NADPH flavoprotein subunit	Grow	Sensitive
	SPCC645.13	bye1	V4-P28-20	transcription elongation regulator, PHD finger Bye1	Grow	Sensitive
	SPCC736.08	cbf11	V4-P28-44	DNA-binding transcription factor, CBF1/Su(H)/LAG-1 family Cbf11	Sensitive	Not tested
	SPCC757.04		V4-P28-60	DNA-binding transcription factor	Grow	Sensitive
	SPCC777.02		V4-P28-66	DNA-binding transcription factor	Grow	Sensitive
	SPAC105.03c		V4-P29-42	DNA-binding transcription factor	Grow	Sensitive
	SPAC139.03	toe2	V4-P29-61	DNA-binding transcription factor, zf-fungal binuclear cluster type	Grow	Sensitive
	SPAC1F7.11c		V4-P30-28	DNA-binding transcription factor, zf-fungal binuclear cluster type	Grow	Sensitive
	SPAC22F3.09c	res2	V4-P30-47	MBF transcription factor complex subunit Res2	Grow	Sensitive
	SPAC3F10.12c		V4-P31-44	DNA-binding transcription factor	Grow	Sensitive
	SPBC1105.14	rsv2	V4-P32-57	DNA-binding transcription factor Rsv2	Grow	Sensitive
	SPBC16G5.15c	fkh2	V4-P33-07	DNA-binding forkhead transcription factor Fkh2	Grow	Sensitive
	SPBC16G5.17		V4-P33-08	DNA-binding transcription factor, zf-fungal binuclear cluster type	Grow	Sensitive
	SPBC19C7.10	bqt4	V4-P33-39	bouquet formation protein Bqt4	Grow	Sensitive
	SPBC2D10.06	rep1	V4-P33-78	MBF transcription factor activator Rep1	Grow	Sensitive
	SPBC32H8.11	mei4	V4-P33-93	DNA-binding forkhead transcription factor, meiotic Mei4	Grow	Sensitive
	SPBC3B8.02	php5	V4-P34-13	CCAAT-binding factor complex subunit Php5	Grow	Suppressed
	SPBC4C3.12	sep1	V4-P34-39	DNA-binding forkhead transcription factor Sep1	Grow	Sensitive
	SPBC56F2.05c		V4-P34-47	DNA-binding transcription factor	Grow	Sensitive
	SPCC18.03		V4-P35-58	shuttle craft like transcriptional repressor/ubiquitin-protein ligase E3	Grow	Sensitive
	SPCC965.10		V4-P36-66	DNA-binding transcription factor	Grow	Sensitive
	SPAC1F7.01c	spt6	V4-P05-73	histone H3-H4 chaperone Spt6	Sensitive	Not tested
	SPAC20H4.03c	tfs1	V4-P05-96	general transcription elongation factor TFIIS	Grow	Suppressed
	SPAC22H10.11c	crf1	V4-P06-76	transcriptional corepressor for ribosomal proteins via TOR signaling pathway Crf1	Grow	Sensitive
	SPAC25G10.03	zip1	V4-P07-66	DNA-binding transcription factor Zip1	Grow	Suppressed
	SPAC3H1.03	mug151	V4-P09-85	Rpd3L complex subunit	Grow	Suppressed
	SPAC4H3.13	pcc1	V4-P10-63	EKC/KEOPS complex subunit Pcc1	Grow	Sensitive
	SPAC630.14c	tup12	V4-P11-33	transcriptional corepressor Tup12	Sensitive	Not tested
	SPAC6G10.12c	ace2	V4-P12-07	DNA-binding transcription factor Ace2	Grow	Sensitive
	SPBC23E6.09	ssn6	V4-P18-91	transcriptional corepressor Ssn6	Grow	Suppressed
	SPBC2F12.11c	rep2	V4-P20-05	MBF transcription factor activator Rep2	Grow	Sensitive
	SPBC800.02	whi5	V4-P23-08	SBF complex transcription corepressor, Whi5	Grow	Sensitive
	SPCC1259.07	rxt3	V4-P25-14	transcriptional regulatory protein Rxt3	Grow	Suppressed
	SPCC1682.07	ssl1	V4-P25-92	transcription factor TFIIH complex subunit Ssl1	Grow	Sensitive
	SPAC22H12.02	tfg3	V4-P30-52	TFIID, TFIIF, Ino80, SWI/SNF, and NuA4 complex YEATS family subunit Tfg3	Grow	Sensitive
	SPBC1198.11c	reb1	V4-P32-59	RNA polymerase I transcription termination factor/ RNA polymerase II transcription factor Reb1	Grow	Suppressed
	SPBC29A3.14c	trt1	V4-P33-73	telomerase reverse transcriptase 1 protein Trt1	Grow	Sensitive
	SPBC30B4.03c	ldb1	V4-P33-84	LIM domain binding protein, transcription coregulator	Grow	Sensitive
	SPBC83.17	mbf1	V4-P34-74	multiprotein bridging factor Mbf1	Grow	Sensitive
	SPCC18.15	dph7	V4-P35-60	diphthamide biosynthesis complex WD repeat protein subunit Dph7	Grow	Sensitive
