# Supplementary material for: Tfs1, transcription elongation factor TFIIS, has an impact on chromosome segregation affected by pka1 deletion in Schizosaccharomyces pombe
Source: Research Square preprint supplement (doi:10.21203/rs.3.rs-2730221/v1), 2023-03-27
Supplement: Supplementary file 3 [file 82c943c064866b036b7af028.docx]

Table S1 Oligonucleotide primers used for making strains in this study

| Primer name | Sequence |
| --- | --- |
| TFS1KOW | 5ʹ-CAATTGAGTAAGATCAAGTC-3ʹ |
| TFS1KOX | 5ʹ-GGGGATCCGTCGACCTGCAGCGTACGAATTCAAATTAAGTTCGAATAC-3ʹ |
| TFS1KOY | 5ʹ-GTTTAAACGAGCTCGAATTCATCGATGTTTTAGGATCTGATTGGTATC -3ʹ |
| TFS1KOZ | 5ʹ-CATTCTTGTCGGAATTATTTG-3ʹ |
| TFS1TAGW | 5ʹ-CTGCCGAATTGGCTTCAGAAG-3ʹ |
| TFS1TAGX | 5ʹ-GGGGATCCGTCGACCTGCAGCGTACGAAGAAAATTTCCAGCGATTTCC-3ʹ |
| MCA1TAGW | 5ʹ-GTACTTGTGTAGTCCTAGATG-3ʹ |
| MCA1TAGX | 5ʹ-GGGGATCCGTCGACCTGCAGCGTACGACGAAAATAAAATACTAAAATG-3ʹ |
| MCA1TAGY | 5ʹ-GTTTAAACGAGCTCGAATTCATCGATGGAATTCCTTTTATTCACGAAC-3ʹ |
| MCA1TAGZ | 5ʹ-GTCATGTCATTCGTTGTCTC-3ʹ |
| MOC3TAGW | 5ʹ-GTTTGGCCGTCCGGTTATTC-3ʹ |
| MOC3TAGX | 5ʹ-GGGGATCCGTCGACCTGCAGCGTACGACTGCAAGGGAAACAATAGAT-3ʹ |
| MOC3TAGY | 5ʹ-GTTTAAACGAGCTCGAATTCATCGATCAATAAATATTGATATAGAAC-3ʹ |
| MOC3TAGZ | 5ʹ-CTTTAAGCAATTGAGCAGCT-3ʹ |
| TFS1-SF | 5ʹ-TATGTCGACTATGGACTCTGCTGATATCCGATC-3ʹ |
| TFS1-BR | 5ʹ-ACAGGATCCTTAAGAAAATTTCCAGCGAT-3ʹ |
| TFS1delN-SF | 5ʹ-TATGTCGACTATGGACTCTGCTGATGGTCGTCCATTGAAAAC-3ʹ |
| TFS1(246-293D)-BR | 5ʹ-ACAGGATCCTTAGGGTTTAGCACCTTGCGCA-3ʹ |
